**A-663 Room 220-222, 10/17/2000 10:30 AM - 12:00 PM (PD)**  
**The Effects of KRN2391 on Circulation and Renal Sympathetic Nerve Activity in Nerve-Intact and Baroreceptor-Denervated Rabbits** *K. Iwasawa, MD; H. Narita, MD; G.K. Unruh, MD; K. Benson, MD; H. Goto, MD, Anesth. Univ. of Kansas Med. Ctr., Kansas City, KS, United States.* Although void of cyanide toxicity, KRN2391, a novel potassium opener, is inferior to nitroprusside when treating acute hypertension.

**A-664 Room 220-222, 10/17/2000 10:30 AM - 12:00 PM (PD)**  
**The Effect of Diasperin Cross-Linked Hemoglobin (Dclhb™) on Hemodynamics, Regional Blood Flow and Oxygen Transport in Early Reperfusion Phase of Orthotopic Liver Transplantation in Pig** *Markus Mueller, MD; Petra Lassak, MD; Hans Juergen Dieterich, MD; Richard Viebahn, MD; Klaus Unertl, MD, PHD, Anesthesiology, University of Tuebingen, Tuebingen, Germany*

**A-665 Room 220-222, 10/17/2000 10:30 AM - 12:00 PM (PD)**  
**Effects of Losartan and Prazocin on Renal and Femoral Blood Flow during Isoflurane Anesthesia in Sheep** *Johan E. Ullman, MD, PhD; Stefan Eriksson, PhD; Mats Rundgren, PhD, Dept of Anesthesiology, Karolinska Hospital, Stockholm, Sweden.* When Losartan is given during isoflurane anaesthesia RBF is increased substantially without any major systemic hypotensive effect.

**A-666 Room 220-222, 10/17/2000 10:30 AM - 12:00 PM (PD)**  
**Epidural Clonidine Suppressed Sympathetic Nerve Activity by Spinal Mechanism** *Kenji Obashi, MD; Kiyonobu Nishikawa, MD; Masato Hatano, MD; Takashi Mori, MD; Akira Asada, MD, Anesthesiology and Intensive Care Medicine, Osaka City University Medical School, Osaka, Japan.* Epidural clonidine produces segmental sympatholysis which supports spinal rather than supraspinal mechanism.

**A-667 Room 220-222, 10/17/2000 10:30 AM - 12:00 PM (PD)**  
**Methamphetamine Causes a Biphasic Temperature Response with High Intravenous Doses in Rats** *Harendra Arora; Michael Owens; Brooks Gentry, Department of Anesthesiology, University of Arkansas for Medical Sciences, Little Rock, AR, United States.* IV methamphetamine causes dose-dependent increases in magnitude, duration and time to peak hemodynamic effects in freely moving rats.

**A-668 Room 220-222, 10/17/2000 10:30 AM - 12:00 PM (PD)**  
**Progressive Development of Vasomotor Activity during Non-Pulsatile Perfusion** *Mibai V. Podgoreanu, M.D.; Robert G. Stout, M.D.; Asbraf Gbobashy, M.D.; David G. Silverman, M.D., Anesthesiology, Yale University School of Medicine, New Haven, CT, United States.* This study documented the time course of microcirculatory oscillatory activity during cardiopulmonary bypass.

**A-669 Room 220-222, 10/17/2000 10:30 AM - 12:00 PM (PD)**  
**Hemodynamic Benefit of PEEP during Acute Aortic Occlusion** *Brendan P. Conroy, FEARCSI; Gregory S. Miller, MD; William E. Johnston, MD, Department of Anesthesiology, University of Texas Medical Branch, Galveston, TX, United States.* PEEP during acute aortic occlusion reduces the hypertensive response and allows volume expansion so that stroke volume is greater after clamp removal.

## Experimental Circulation: Vascular Biology/ Pharmacology

**A-670 Room 220-222, 10/17/2000 3:30 PM - 5:00 PM (PD)**  
**Epinephrine Causes Direct Coronary Vasodilation in Normal but Not in Stunned Myocardium in Dogs** *Kyung Yeon Yoo, M.D.; JongUn Lee, M.D.; Myung Ha Yoon, M.D.; Sung Su Chung, M.D.; Chang Young Jeong, M.D., Anesthesiology, Chonnam National University Medical School, Kwangju, Korea.* We examined the effect of EPI on myocardial O<sub>2</sub> balance and found that EPI produced direct coronary vasodilation.

**A-671 Room 220-222, 10/17/2000 3:30 PM - 5:00 PM (PD)**  
**Loss of Relaxation to Fenoldopam in the Rat Renal and Superior Mesenteric Artery, but Not in the Aorta** *Michael H. Wall, M.D.; Pamela R. Roberts, M.D.; Miyuki Shouse, M.S.; Joseph R. Tobin, M.D.; Richard C. Prielipp, M.D., Anesth. Dept., Wake Forest Univ. Sch. of Med., Winston-Salem, NC, United States.* FEN has dramatically different pharmacodynamic effects in vascular rings isolated from different arteries of rats.

**A-672 Room 220-222, 10/17/2000 3:30 PM - 5:00 PM (PD)**  
**Sevoflurane and Desflurane Anesthesia Attenuate the Pulmonary Vasodilator Response to  $\beta$  Adrenoreceptor Activation** *Stephen Davis, MD; Marc Lesitsky, MD; Paul Murray, PhD, Anesthesiology Research, Cleveland Clinic Foundation, Cleveland, OH, United States.* Sevoflurane and desflurane attenuate the pulmonary vasodilator response to  $\beta$  adrenoreceptor activation.

**A-673 Room 220-222, 10/17/2000 3:30 PM - 5:00 PM (PD)**  
**cGMP-Independent Vasodilatation of Human Coronary Arteries by Nitroglycerin Via  $K_{Ca}$  Channels** *Jure Marijic, M.D.; Jae Babb, M.D.; Qingxia Li, Ph.D.; Nediljka Buljubasic, M.D., Ph.D.; Ligia Toro, Ph.D., Anesthesiology, UCLA, Los Angeles, CA, United States.* A significant component of NTG-induced dilatation of human coronary arteries is present after guanylyl cyclase inhibition and is mediated via  $Ca^{2+}$ -dependent  $K^{+}$  channels.

**A-674 Room 220-222, 10/17/2000 3:30 PM - 5:00 PM (PD)**  
**The Effect of Tramal for The Treatment of Shivering during Awake Period of Mild Hypothermia** *Zhenbe Lu, bachelor; Gao Chongrong, bachelor; Zhou Yongzhi, bachelor, Anesthesiology, 2th Affiliated Hospital of Guangzhou Medical College, Guangzhou, Guangdong, China.* Administration of tramal can produce better therapeutic effect for the shivering during awake period of mild hypothermia.

**A-675 Room 220-222, 10/17/2000 3:30 PM - 5:00 PM (PD)**  
**The Effect of Hypoxia on Human Pulmonary Artery *In Vitro*: Normal and Emphysema Tissue** *Vit B. Gunka, MD; Michael E. Orzo, MD; Nicholas A. Flavaban, PhD; Ronald L. Harter, MD, Anesthesiology, The Ohio State University, Columbus, OH, United States*

**A-676 Room 220-222, 10/17/2000 3:30 PM - 5:00 PM (PD)**  
**Pulmonary Vasodilator Response to  $K^{+}_{ATP}$  Channel Activation Is Attenuated during Propofol Anesthesia Compared to the Conscious State** *Si-Oh Kim, MD; Paul Murray, PhD, Anesthesiology Research, Cleveland Clinic Foundation, Cleveland, OH, United States.* Propofol attenuates the pulmonary vasodilator response to  $K^{+}_{ATP}$  channel activation.
